# Supplementary material
Source: PubMed Central journal article supplement (PMC11386898)
Supplement: PBI-17-435-s004.pdf [file PBI-17-435-s004.pdf]

# Supporting Figures

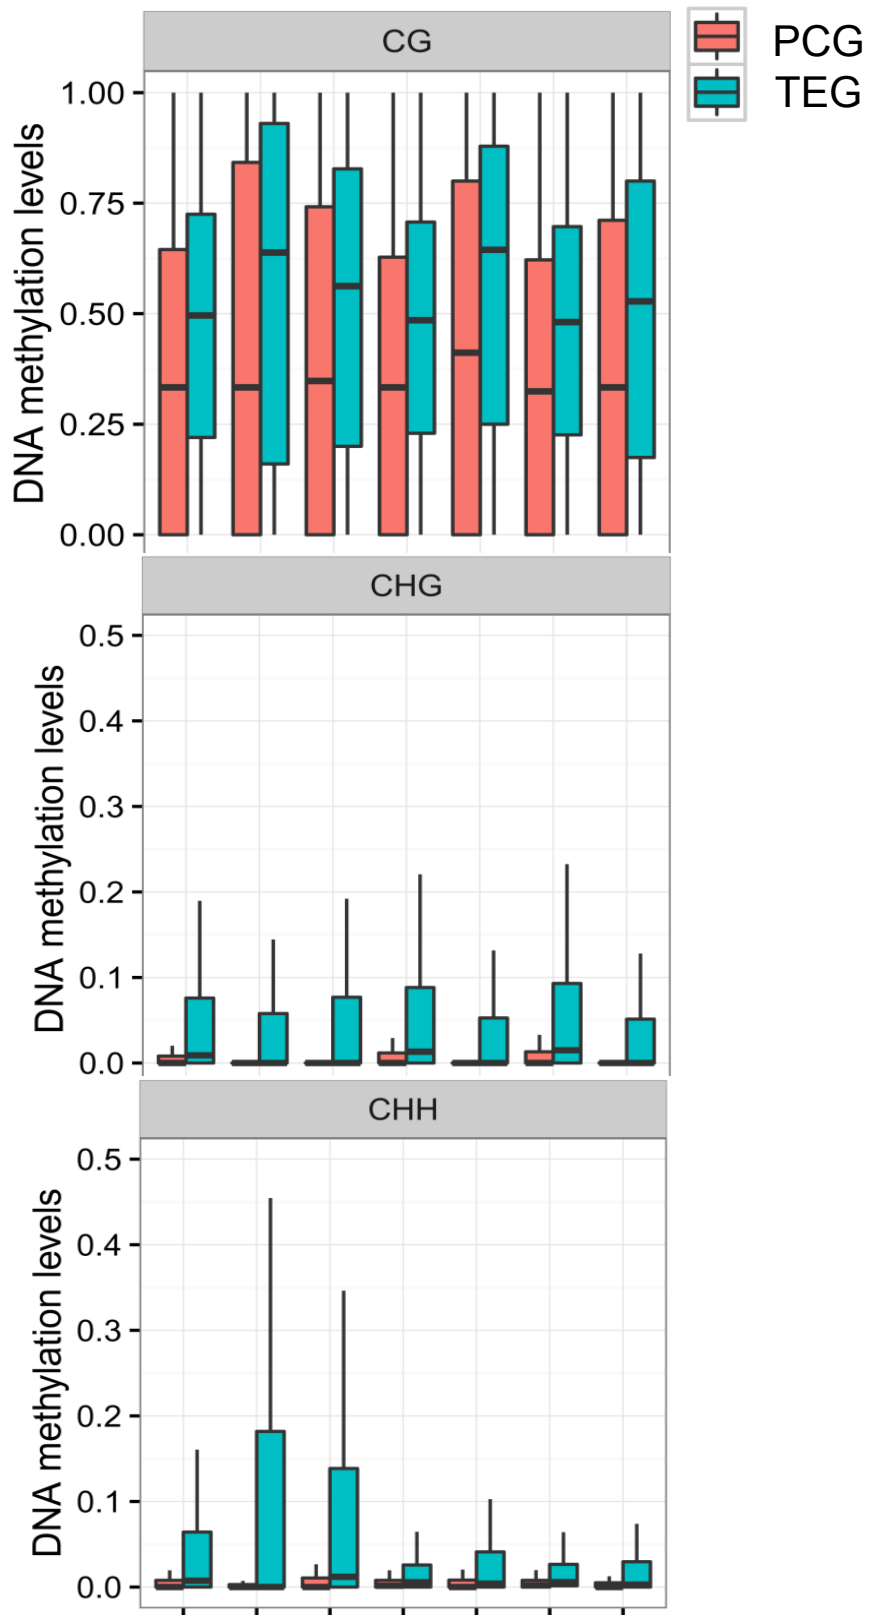

Figure S1 CG, CHG and CHH methylation patterns of TEGs and PCGs.

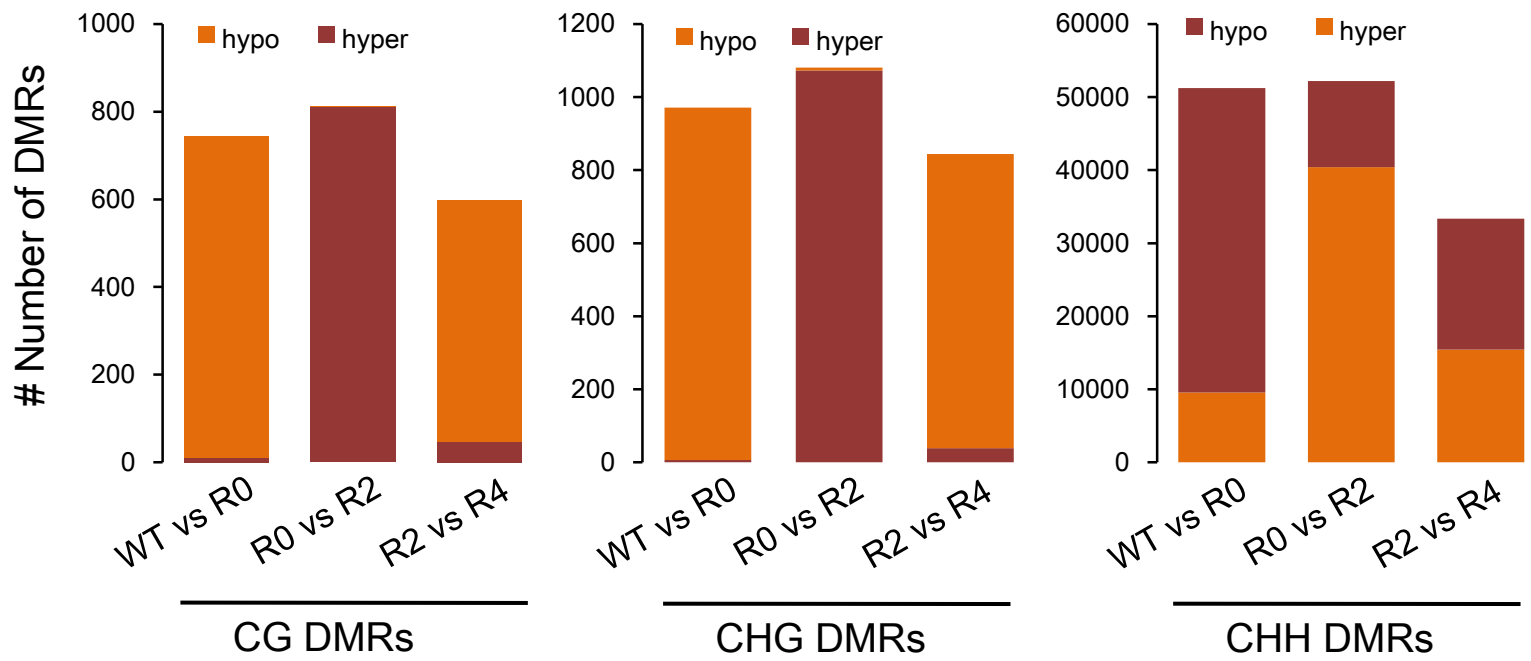

**Figure S2** The numbers of hypomethylated (Hypo) and hypermethylated (Hyper) context-specific differentially methylated regions (DMRs) in regenerated plants.

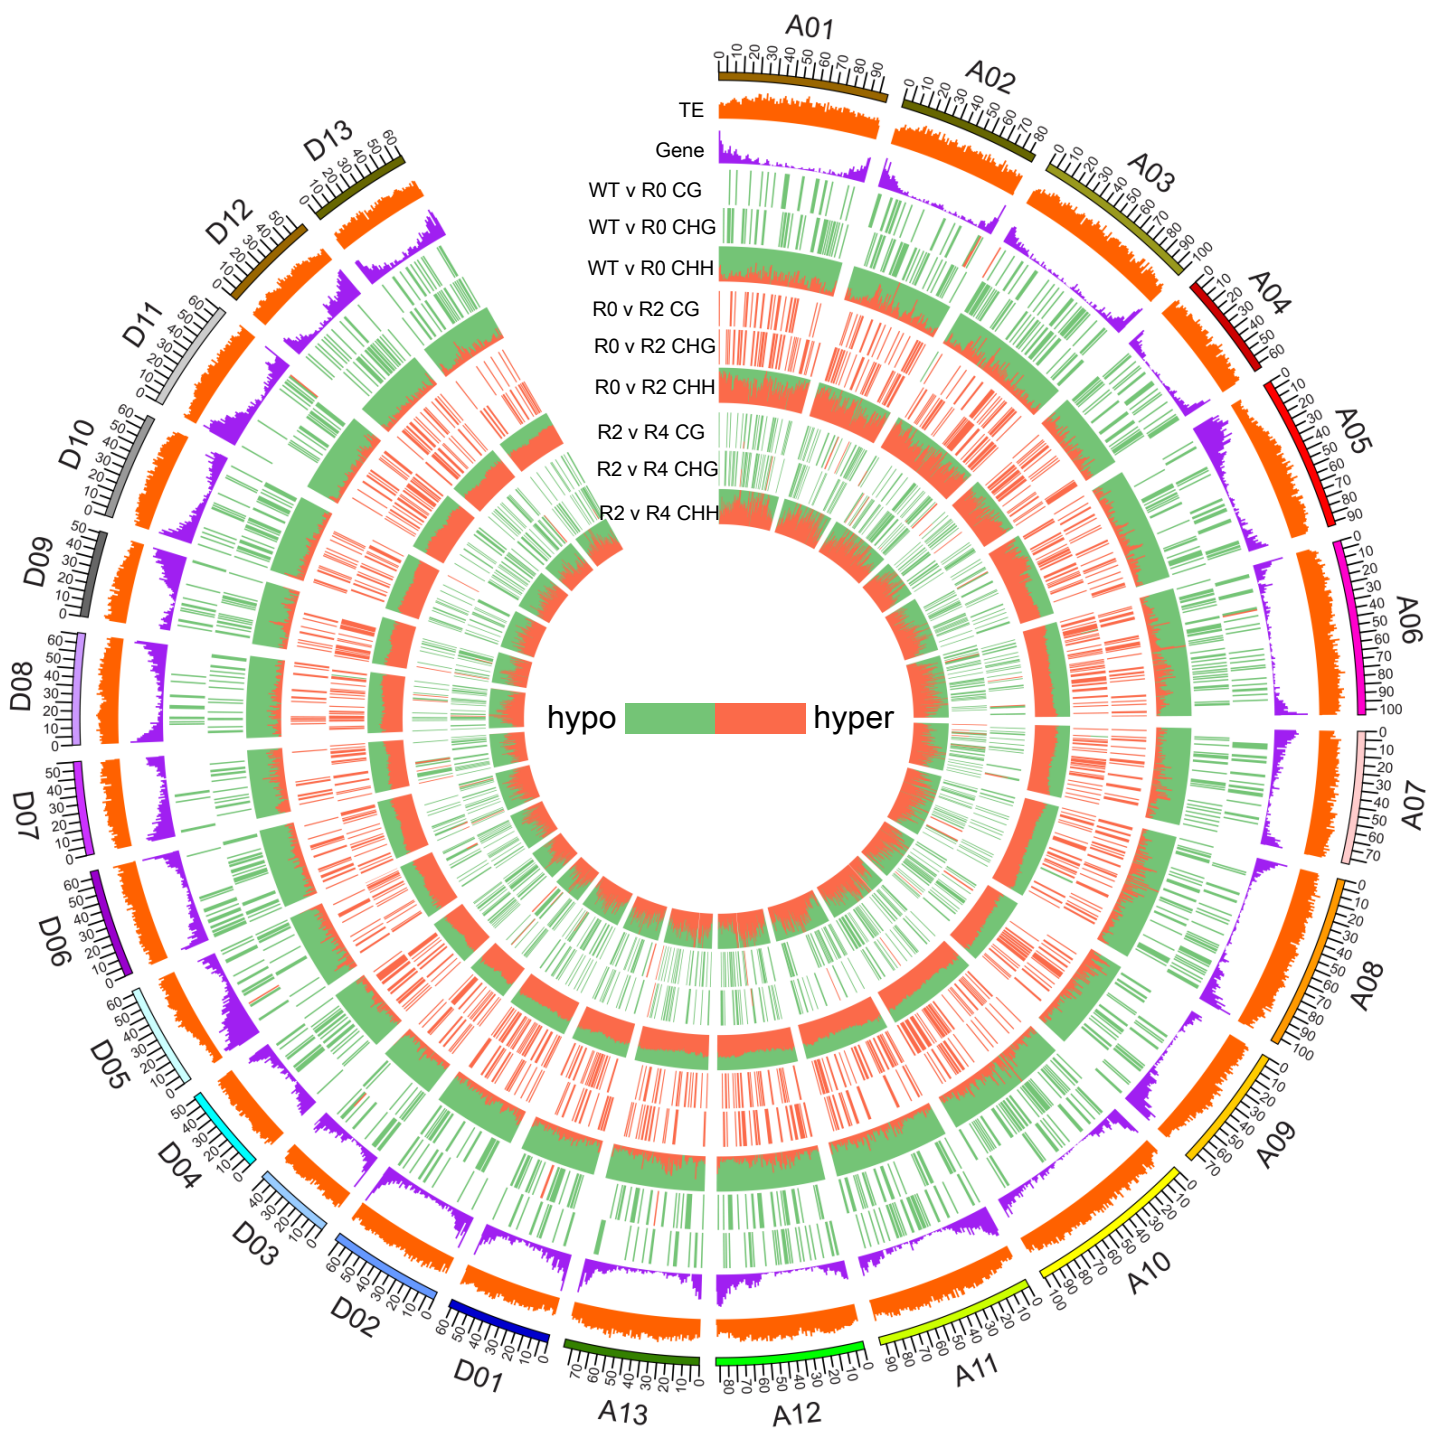

**Figure S3** A circos plot of the TE density, gene density, CG-differentially methylated region (DMR), CHG-DMR, and CHH-DMR in comparisons of WT\_vs\_R0, R0\_vs\_R2 and R2\_vs\_R4. The hyper-DMRs and hypo-DMRs were normalized by the density. The red and green colors represent hyper-DMRs and hypo-DMRs, respectively.

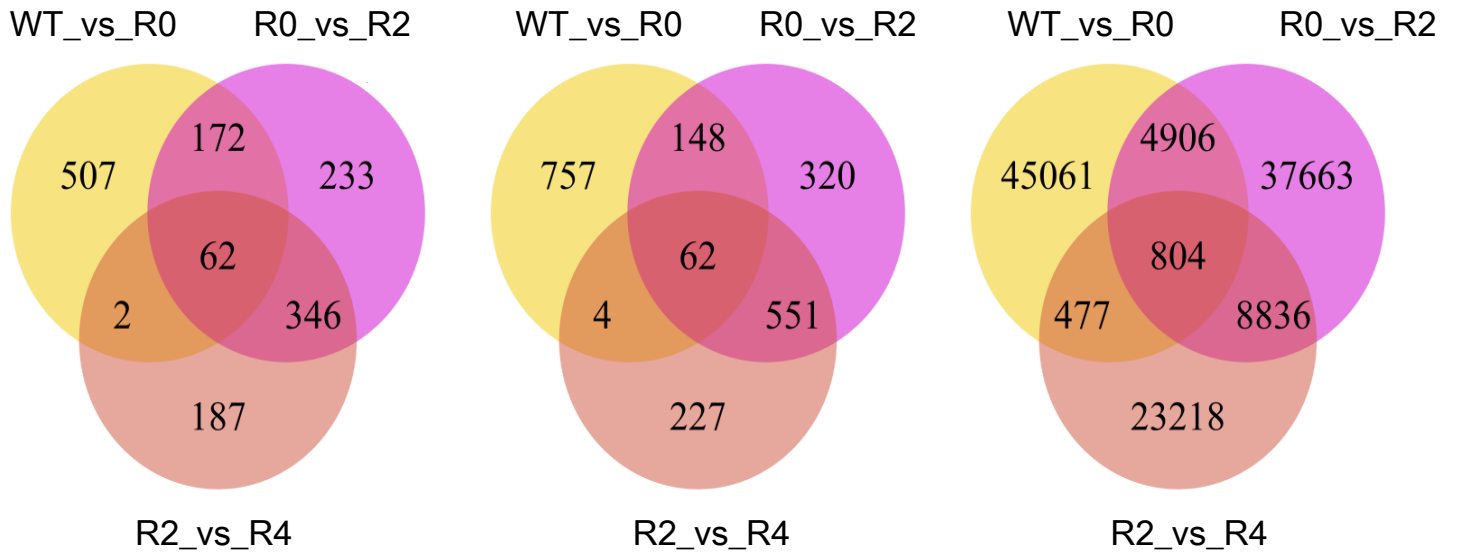

**Figure S4** The number of overlapped CG-, CHG- and CHH-DMRs in the three groups.

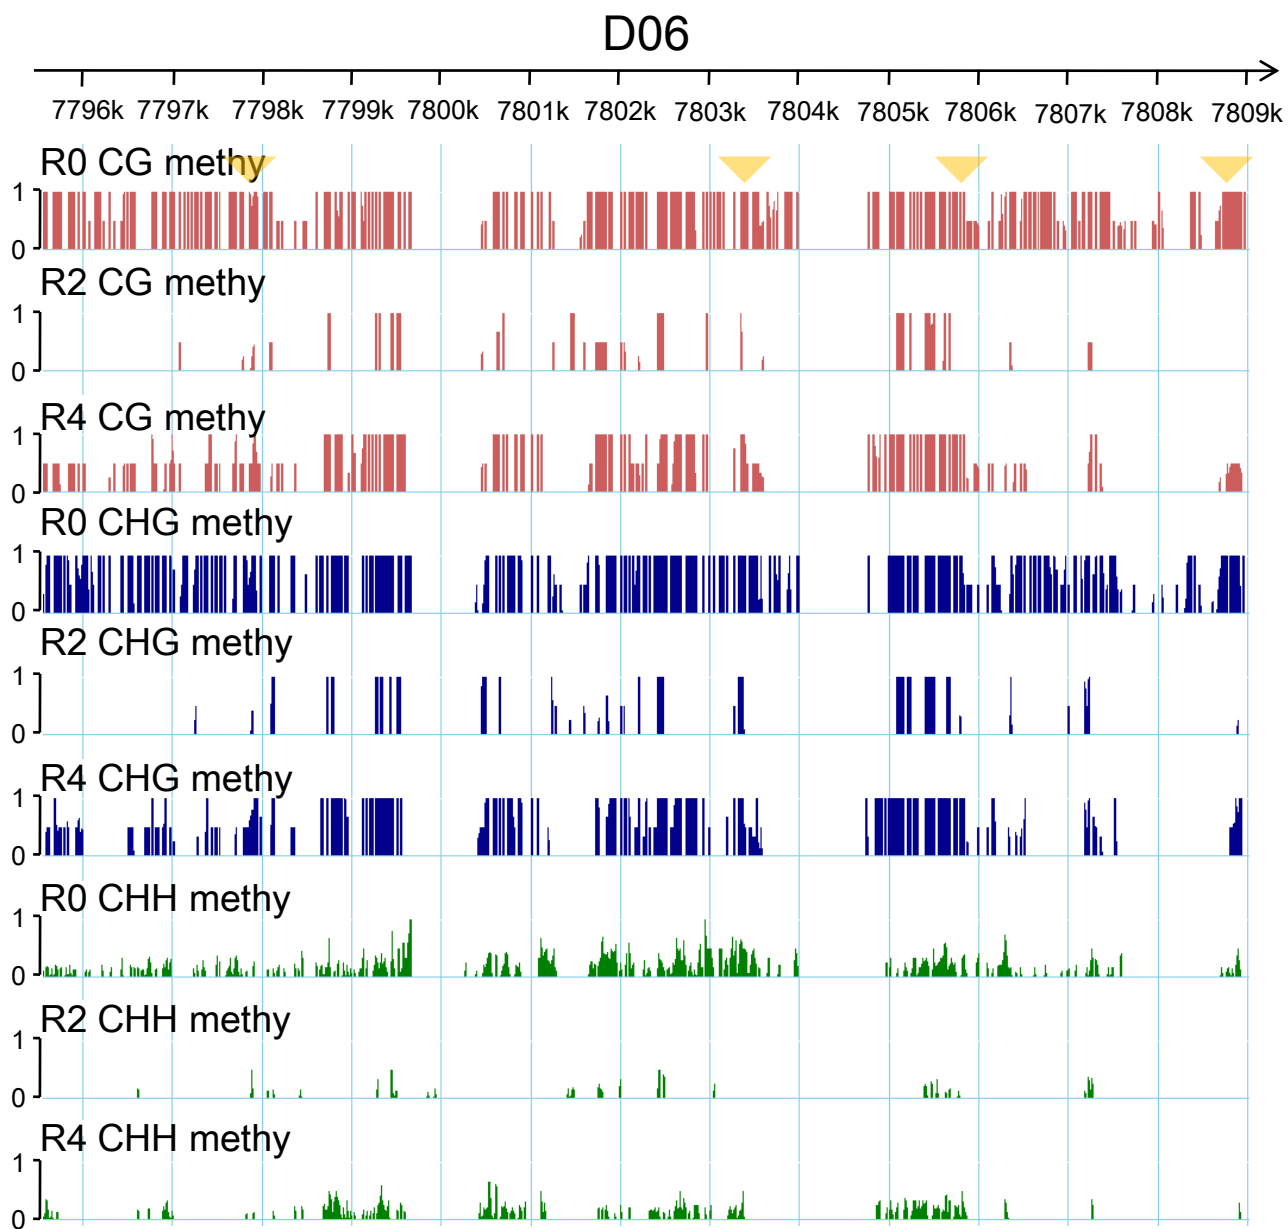

**Figure S5** An example of hypermethylation in the comparison of R0\_vs\_R2. Every orange triangle represents one DMR.

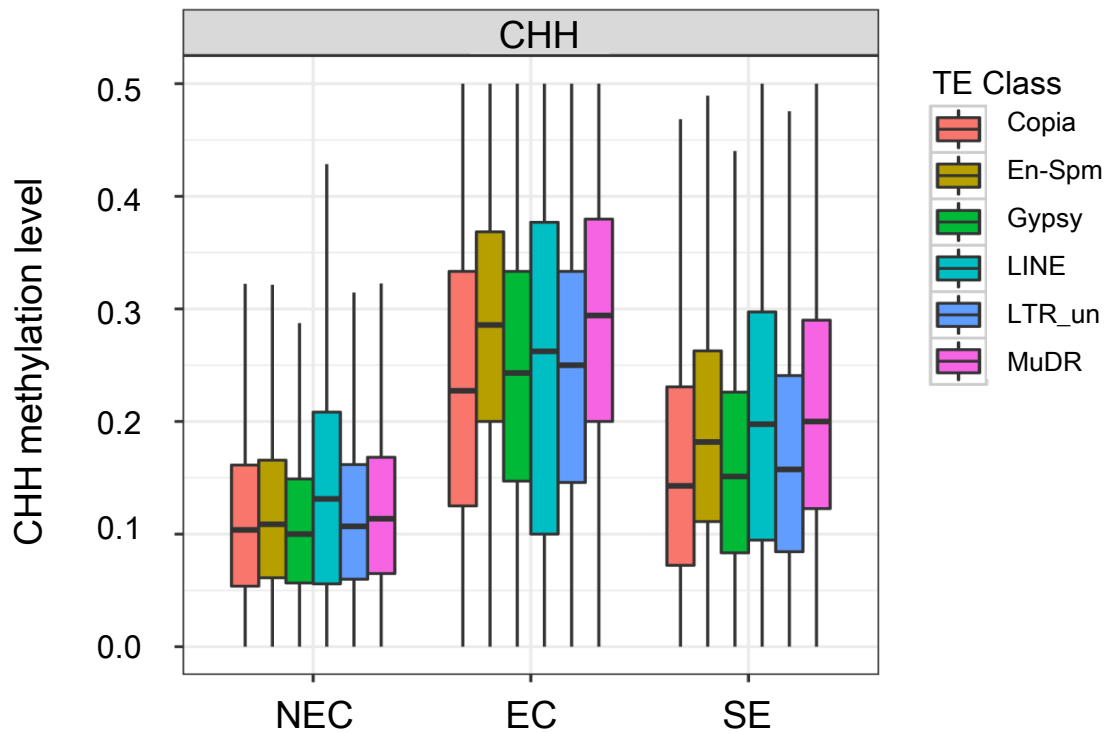

**Figure S6** CHH methylation level in different TE families during the somatic embryogenesis process

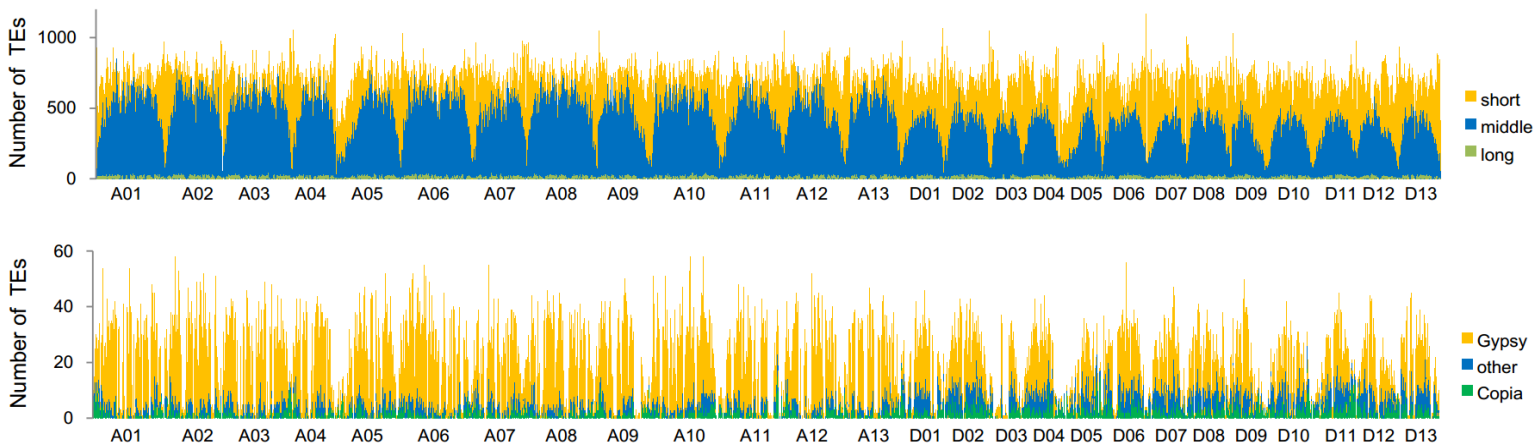

**Figure S7** The distribution of TEs length. The upper panel are short TE (<0.5kb), middle TE (0.5-4kb), and long TE (>4kb) according to TE length. The long TE divide into long Gypsy, long Copia, and the others (under panel).

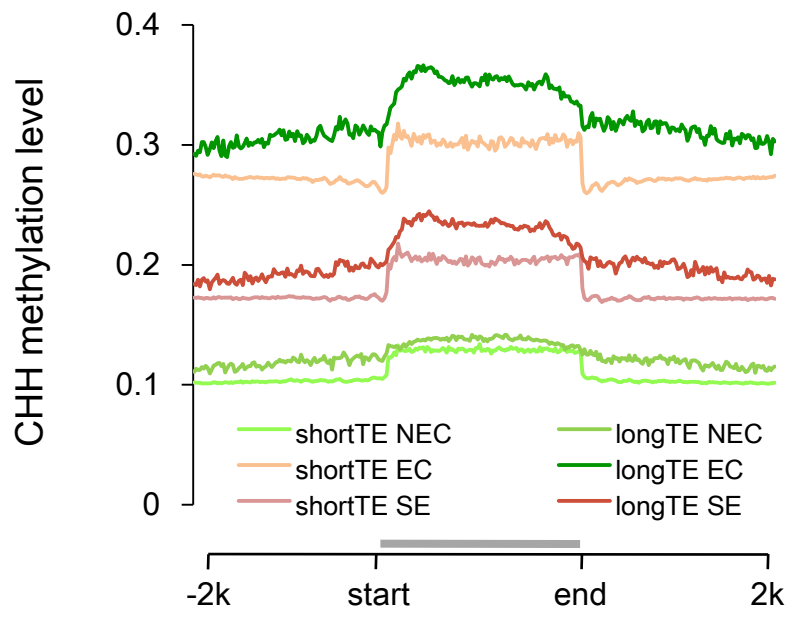

**Figure S8** Average distribution of CHH methylation in short TEs and long TEs with their flanking 2-kb regions.

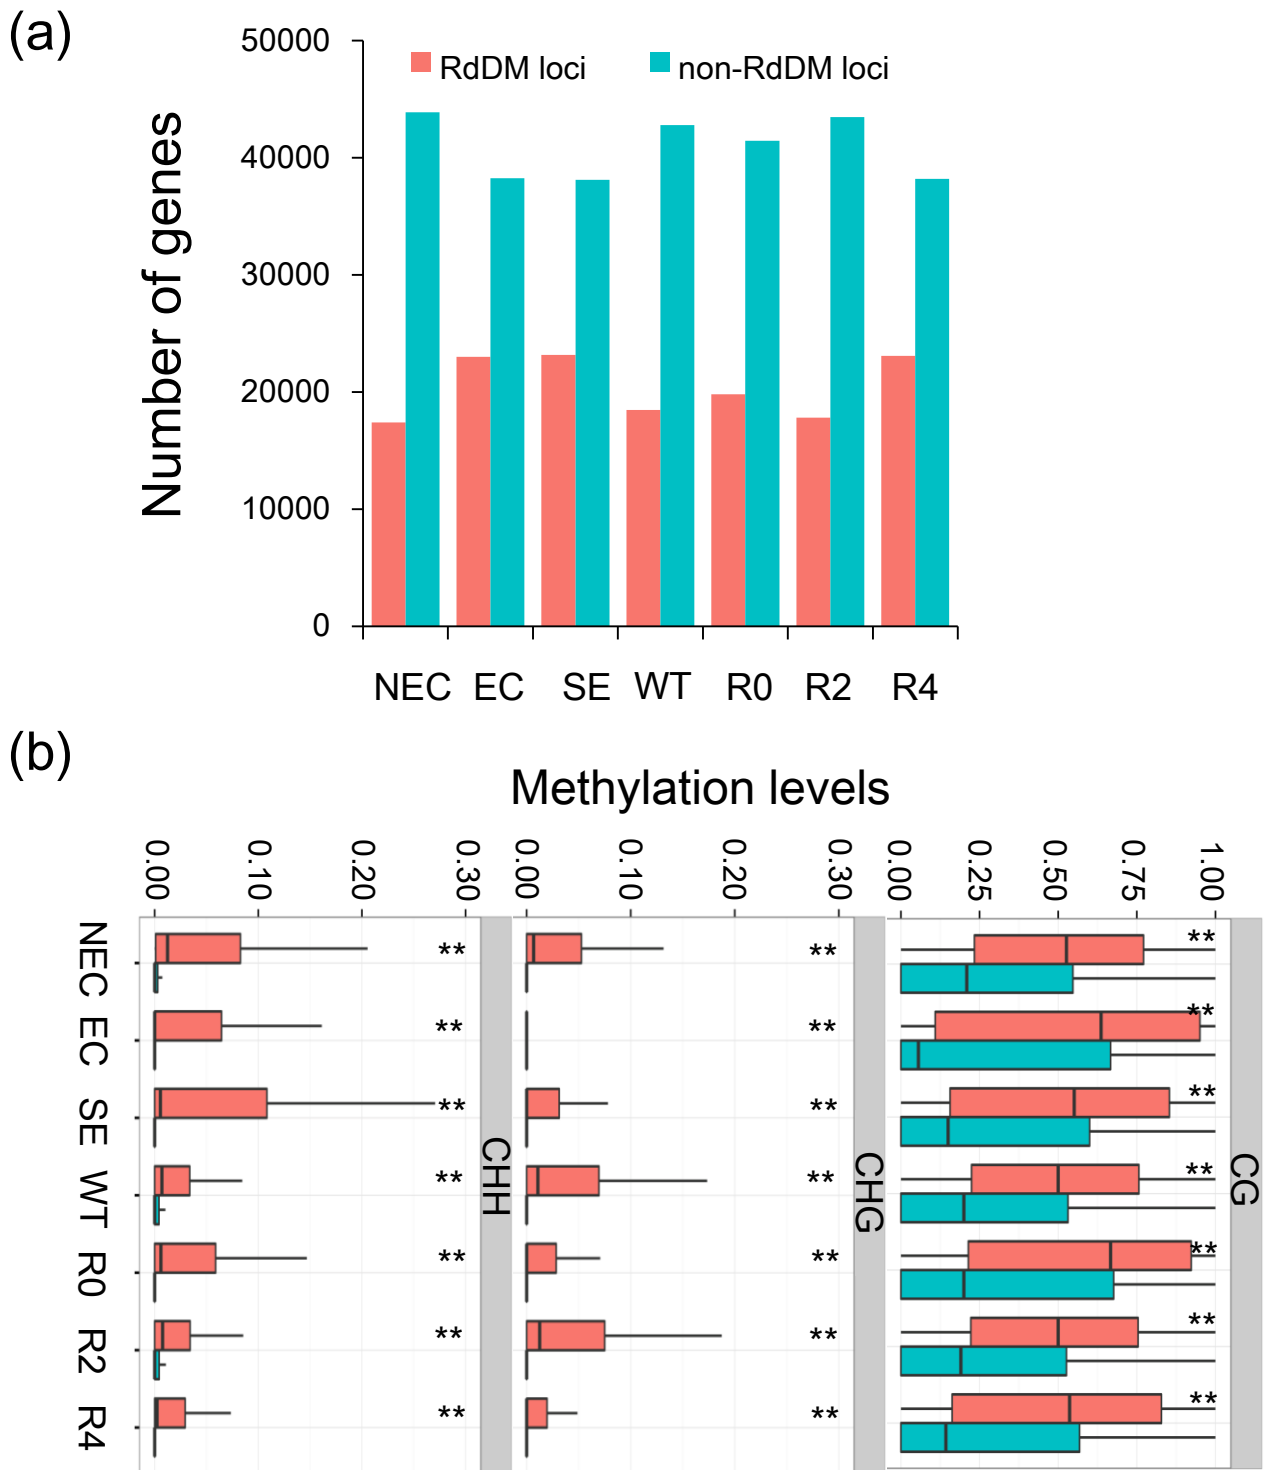

**Figure S9** The RdDM effects in gene body region during the somatic embryogenesis process. (a) The number of RdDM loci overlapped (red) and non-overlapped (green) genes. (b) The DNA methylation patterns of RdDM loci marked genes and non-RdDM loci marked genes in the tissue culture process and regenerated plants.



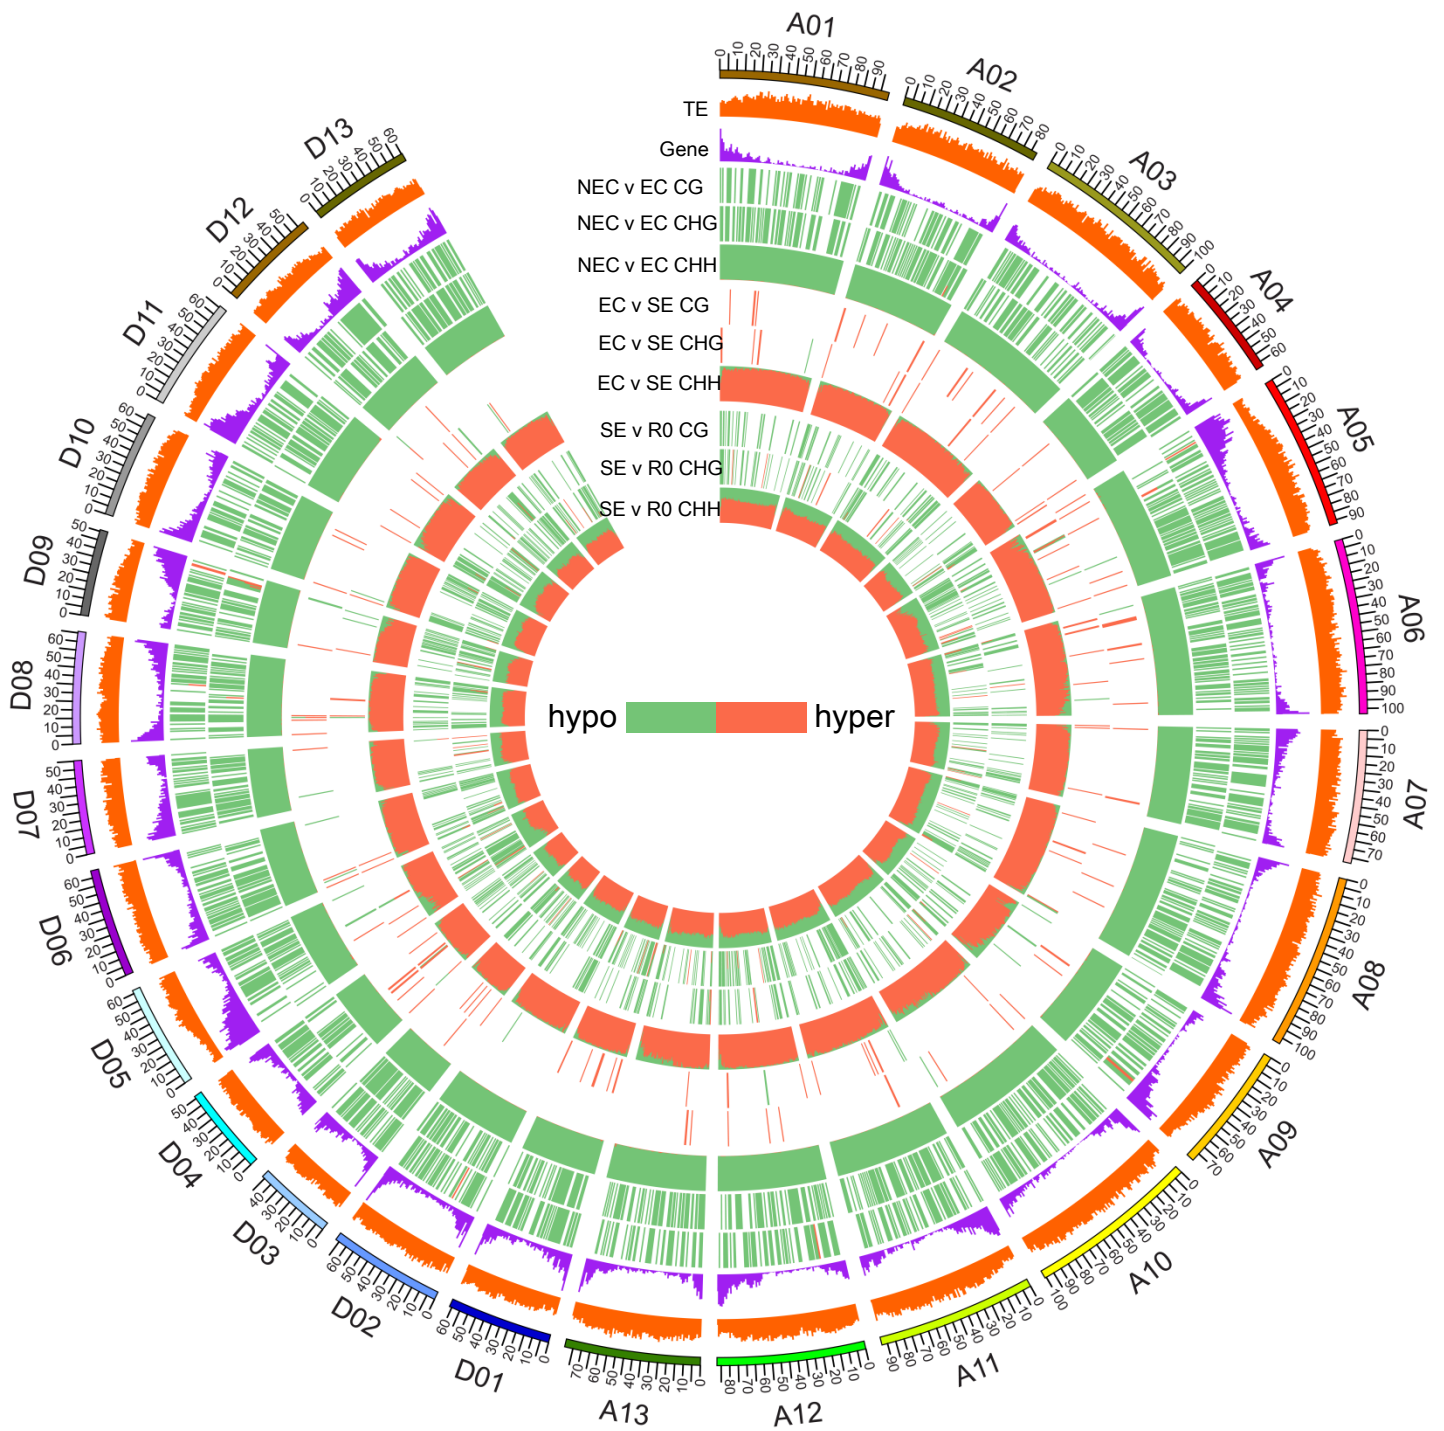

**Figure S10** The circos plot shows the TE density, gene density, CG-DMR, CHG-DMR and CHH-DMR in NEC\_vs\_EC, EC\_vs\_SE and SE\_vs\_R0 groups.

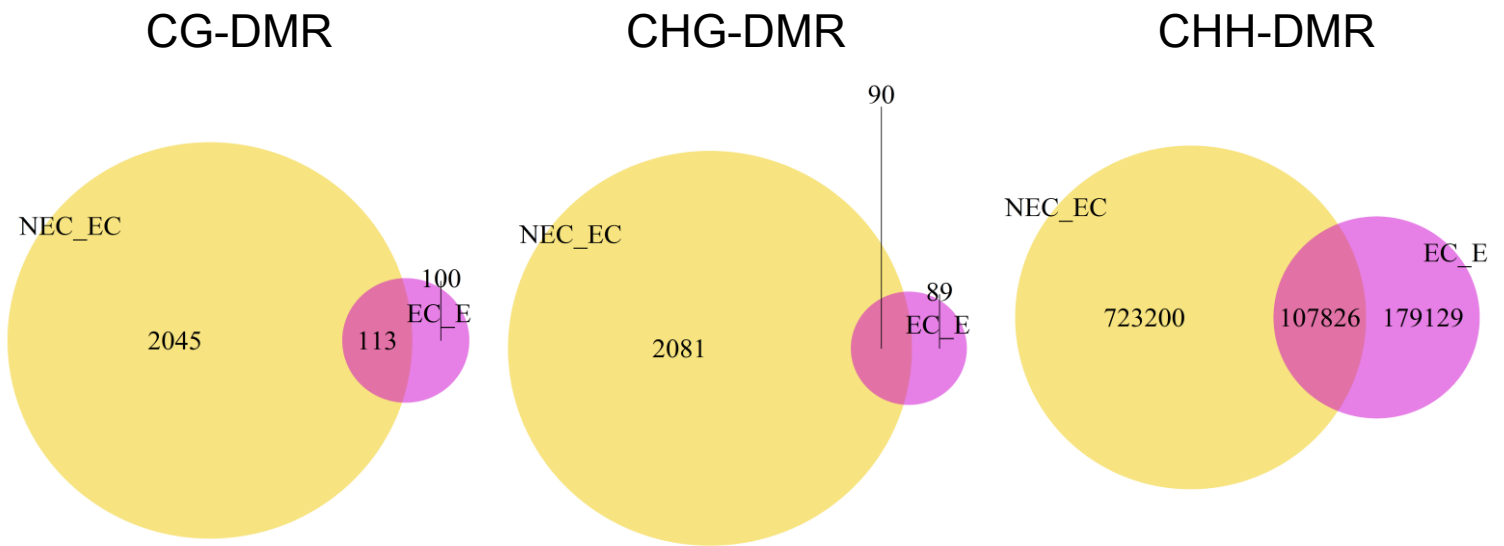

**Figure S11** The numbers of overlapped CG-, CHG-, CHH-DMRs during tissue culture development stages and from WT to regeneration plants.

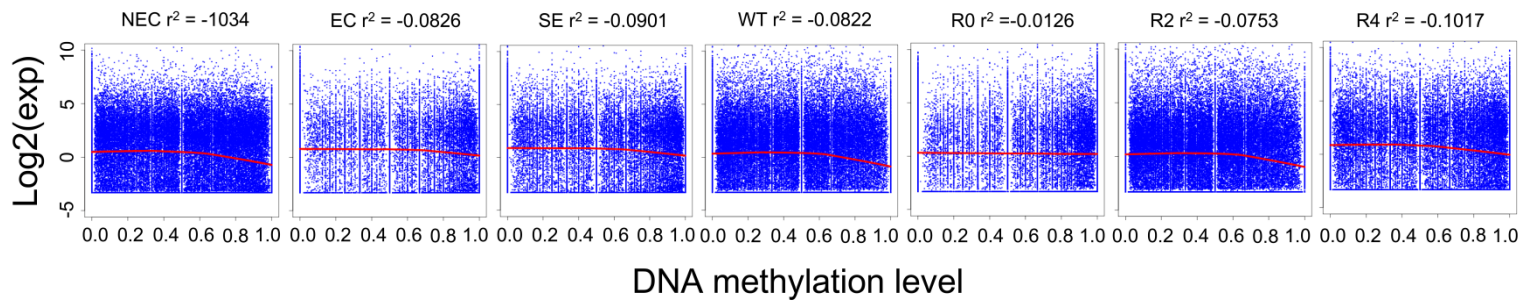

**Figure S12** Gene expression have weak negatively correlation with DNA methylation of gene promoter 2KB. The 'Log2(exp)' represent the normalized the gene expression.
