# Supplementary material
Source: PubMed Central journal article supplement (PMC11386898)
Supplement: PBI-17-435-s005.pdf [file PBI-17-435-s005.pdf]

# Supporting Tables

**Table S1** Summary of BS-Seq data in *G.hirsutum*.

| Samples | Raw reads   | Clean reads | Depth | Coverage (>3) | Unique mapping | SRA accession |
|---------|-------------|-------------|-------|---------------|----------------|---------------|
| NEC     | 169,963,719 | 143,061,716 | 13.6  | 322,454,486   | 70.50%         | SRR5527420    |
| EC      | 170,884,736 | 139,309,348 | 13.67 | 210,720,869   | 75.70%         | SRR5527422    |
| SE      | 170,885,236 | 138,210,842 | 13.67 | 265,407,542   | 72.70%         | SRR5527423    |
| WT      | 160,863,889 | 115,480,444 | 12.87 | 236,595,542   | 59.10%         | SRR5527460    |
| R0      | 182,884,232 | 138,456,249 | 14.63 | 291,773,956   | 73.10%         | SRR5527461    |
| R2      | 132,406,207 | 111,063,155 | 10.59 | 241,982,385   | 67.10%         | SRR5527462    |
| R4      | 180,884,336 | 149,275,437 | 14.47 | 265,927,442   | 72.40%         | SRR5527463    |

**Table S2** Identification of methylated cytosines in each of the seven samples.

| Type | NEC        | EC          | SE         | WT         | R0         | R2         | R4         |
|------|------------|-------------|------------|------------|------------|------------|------------|
| mCG  | 36,198,946 | 28,476,574  | 32,530,275 | 24,060,024 | 35,968,628 | 24,047,701 | 32,388,673 |
| mCHG | 33,461,047 | 30,169,229  | 32,567,664 | 20,609,240 | 35,519,046 | 20,681,707 | 31,435,968 |
| mCHH | 26,075,746 | 152,075,066 | 38,802,630 | 9,518,666  | 19,900,255 | 10,071,516 | 12,883,370 |

**Table S3** Summary of small RNA-Seq data.

| Sample   | Raw reads  | uniq reads | 24-nt mapping | SRA accession |
|----------|------------|------------|---------------|---------------|
| NEC_Rep1 | 10,988,643 | 942,251    | 90.83%        | SRR5527300    |
| NEC_Rep2 | 10,789,959 | 2,483,594  | 73.31%        | SRR5527301    |
| EC_Rep1  | 11,246,664 | 5,115,114  | 75.30%        | SRR5527302    |
| EC_Rep2  | 11,170,465 | 4,702,214  | 74.32%        | SRR5527303    |
| SE_Rep1  | 11,033,946 | 5,124,031  | 75.81%        | SRR5527304    |
| SE_Rep2  | 11,303,312 | 5,098,147  | 76.36%        | SRR5527413    |
| WT_Rep1  | 11,380,515 | 4,215,399  | 69.57%        | SRR5527452    |
| WT_Rep2  | 10,041,102 | 1,949,794  | 89.15%        | SRR5527453    |
| R0_Rep1  | 10,014,283 | 2,801,352  | 91.31%        | SRR5527454    |
| R0_Rep2  | 11,481,165 | 5,501,111  | 75.54%        | SRR5527455    |
| R2_Rep1  | 10,036,477 | 2,217,621  | 89.49%        | SRR5527456    |
| R2_Rep2  | 11,101,114 | 5,166,868  | 73.49%        | SRR5527457    |
| R4_Rep1  | 11,344,495 | 3,969,251  | 73.65%        | SRR5527458    |
| R4_Rep2  | 11,319,537 | 4,209,981  | 75.16%        | SRR5527459    |

**Table S4** Summary of H3K9me2 data.

| Samples     | Raw reads  | Clean reads | H3K9me2 peaks | SRA accession |
|-------------|------------|-------------|---------------|---------------|
| NEC_H3K9me2 | 34,456,614 | 26,636,054  | 23,225        | SRR5527424    |
| EC_H3K9me2  | 28,920,348 | 26,528,132  | 22,892        | SRR5527424    |
| SE_H3K9me2  | 29,440,811 | 21,579,511  | 39,838        | SRR5527424    |

**Table S5** Summary of the full names of DNA methylation pathway related genes.

| Gosspium hirsutum |                                |                         |                         |
|-------------------|--------------------------------|-------------------------|-------------------------|
| Gene symbol       | Gene Name                      | A-genome                | D-genome                |
| MET1              | methyltransferases 1           | Gh_A05G3224,            | Gh_D04G0381             |
| CMT3              | chromomethylase 3              | Gh_A07G0385,Gh_A13G2087 | Gh_D07G0449             |
| CMT2              | chromomethylase 2              | Gh_A08G1371,Gh_A08G1372 | Gh_D08G1665,Gh_D08G1666 |
| AGO4              | Argonaute family protein 4     | Gh_A08G1752             | Gh_D08G2707             |
| DCL3              | dicer-like 3                   |                         | Gh_D06G0845,Gh_D13G2027 |
| RDR2              | RNA-dependent RNA polymerase 2 | Gh_A12G2496             | Gh_D12G2624             |
| DDM1              | decreased DNA methylation 1    | Gh_A12G0603             | Gh_D12G2782             |
| NRP               | nuclear RNA polymerase A/C     |                         | Gh_D03G0635,Gh_D11G0040 |
| DRM               | DNA glycosylase DEMETER        |                         |                         |
| ROS1              | repressor of silencing 1       | Gh_A04G0555             | Gh_D04G1010             |

**Table S6** Summary of RNA-Seq data.

| Samples  | Raw reads  | Clean reads | mapping | SRA accession |
|----------|------------|-------------|---------|---------------|
| NEC_Rep1 | 27,374,440 | 22,333,987  | 92.60%  | SRR5527245    |
| NEC_Rep2 | 25,409,326 | 22,236,782  | 92.50%  | SRR5527246    |
| EC_Rep1  | 42,701,596 | 37,990,391  | 96.50%  | SRR5527247    |
| EC_Rep2  | 31,225,317 | 27,574,399  | 92.50%  | SRR5527248    |
| SE_Rep1  | 59,636,331 | 47,429,531  | 94.30%  | SRR5527249    |
| SE_Rep2  | 26,570,105 | 23,483,786  | 92.00%  | SRR5527250    |
| WT       | 27,379,640 | 22,696,970  | 90.50%  | SRR5527434    |
| R0       | 28,276,570 | 23,238,678  | 90.30%  | SRR5527435    |
| R2       | 30,308,644 | 24,877,011  | 92.60%  | SRR5527436    |
| R4       | 51,516,953 | 20,822,106  | 85.00%  | SRR5527437    |

**Table S7** Summary of RNA-Seq data from mock and zebularine treatment of callus.

| Samples    | Raw reads  | Clean reads | Unpaired reads | MappingGh | SRA accession |
|------------|------------|-------------|----------------|-----------|---------------|
| mock_Rep1  | 17,509,741 | 15,533,491  | 1,568,118      | 91.80%    | SRR5383896    |
| mock_Rep2  | 12,895,037 | 11,229,712  | 1,357,530      | 91.60%    | SRR5383897    |
| 100um_Rep1 | 15,226,047 | 13,392,882  | 1,465,685      | 91.70%    | SRR5383898    |
| 100um_Rep2 | 14,552,249 | 12,798,035  | 1,344,958      | 91.80%    | SRR5383899    |

**Table S8** The expression patterns of RdDM related genes and DNA methyltransferases under zebularine treatment.

| symbol | gene_id     | mock_Rep1 | mock_Rep2 | 100um_Rep1 | 100um_Rep2 |
|--------|-------------|-----------|-----------|------------|------------|
| CMT2   | Gh_D08G1665 | 3.22386   | 4.07339   | 3.42361    | 3.33926    |
|        | Gh_D08G1666 | 8.86877   | 10.1301   | 10.2171    | 13.2116    |
|        | Gh_A08G1371 | 2.57523   | 2.44502   | 2.40607    | 2.3281     |
|        | Gh_A08G1372 | 6.86816   | 6.52455   | 6.01481    | 5.3889     |
| DCL3   | Gh_D06G0845 | 3.63062   | 4.213     | 4.35725    | 4.22331    |
|        | Gh_D13G2027 | 0.114138  | 0.113714  | 0.32356    | 0.198201   |
| DDM1   | Gh_A12G0603 | 1.30536   | 1.37174   | 1.56663    | 2.02044    |
|        | Gh_D12G2782 | 0.625157  | 1.3824    | 1.96155    | 2.1153     |
| RDR2   | Gh_D12G2624 | 2.01071   | 2.25415   | 2.89741    | 2.38717    |
|        | Gh_A12G2496 | 1.84548   | 1.93774   | 1.72228    | 1.3617     |
| NRPD   | Gh_A11G0189 | 0.0395028 | 0.0275732 | 0.0230648  | 0.0479846  |
|        | Gh_D08G1916 | 1.39079   | 1.1665    | 1.28882    | 0.997748   |
|        | Gh_A08G1605 | 1.04626   | 1.14978   | 1.03578    | 1.00115    |
|        | Gh_D11G0200 | 1.90238   | 2.27749   | 1.57159    | 0.900469   |
| DRM1   | Gh_A09G0264 | 6.95835   | 7.44438   | 9.07887    | 7.71594    |
|        | Gh_D09G0266 | 7.17104   | 7.08213   | 8.95675    | 6.2013     |
|        | Gh_A05G3114 | 0.780303  | 0.492613  | 0.456679   | 0.425843   |
|        | Gh_D04G0527 | 4.65802   | 4.17598   | 2.74289    | 2.32056    |
| AGO4   | Gh_A08G1752 | 37.0492   | 36.1401   | 43.4166    | 36.6895    |
|        | Gh_D08G2707 | 23.0665   | 23.492    | 32.5425    | 28.8187    |
| MET1   | Gh_A05G3224 | 3.36949   | 3.77256   | 2.45366    | 2.03673    |
|        | Gh_D04G0381 | 11.5964   | 12.4232   | 4.00875    | 3.64981    |
| CMT3   | Gh_D07G0449 | 0.480342  | 0.485296  | 0.373776   | 0.355858   |
|        | Gh_A07G0385 | 0.876912  | 0.705517  | 0.432972   | 0.546233   |
|        | Gh_A13G2087 | 3.55864   | 3.44512   | 3.63835    | 3.27368    |
| ROS1   | Gh_D04G1010 | 9.78204   | 12.0622   | 9.46397    | 8.26991    |
|        | Gh_D09G1341 | 0.416767  | 0.629581  | 0.360521   | 0.332592   |
|        | Gh_A04G0555 | 9.46008   | 12.1205   | 8.63702    | 7.64892    |
|        | Gh_A09G2457 | 0.660272  | 0.680856  | 0.470501   | 0.282463   |
| DME    | Gh_D01G1149 | 1.11586   | 1.05176   | 1.37154    | 1.3126     |
|        | Gh_A01G1068 | 0.53836   | 0.579204  | 0.327262   | 0.474756   |
|        | Gh_D05G0847 | 0.180301  | 0.347534  | 0.30667    | 0.319693   |
|        | Gh_A05G0700 | 0.682124  | 0.910328  | 0.910421   | 0.741722   |

**Data S1** The expression and mCHH methylation encoding RdDM pathway genes.

**Data S2** The hyper-DMRs (promoter 2-kb) in ECs and corresponding gene expression from NEC to EC.

**Data S3** The expression and mCHH methylation hormone-related genes somatic embryogenesis process.
